# Supplementary material
Source: Springer Nature journal article supplement (https://www.springermedizin.de/resource/supplementary/12885_2011_2810_MOESM1_ESM.pdf/9462056)

Family 1, Agilent arrays

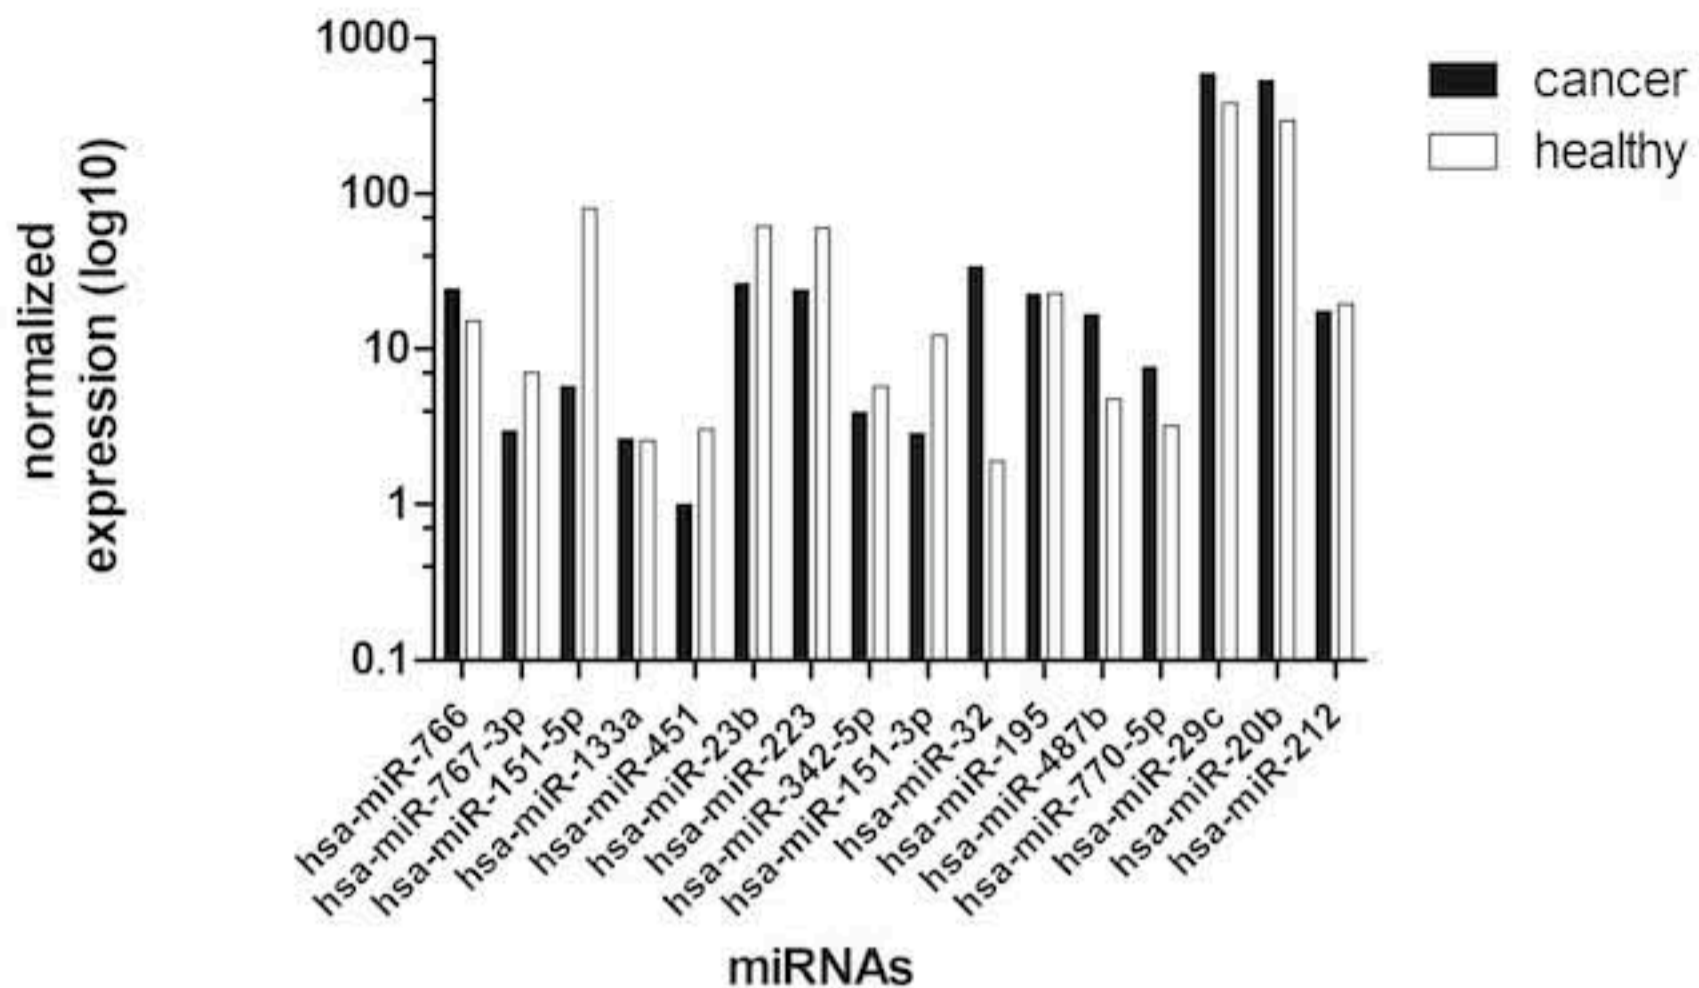

Family 15, Agilent arrays

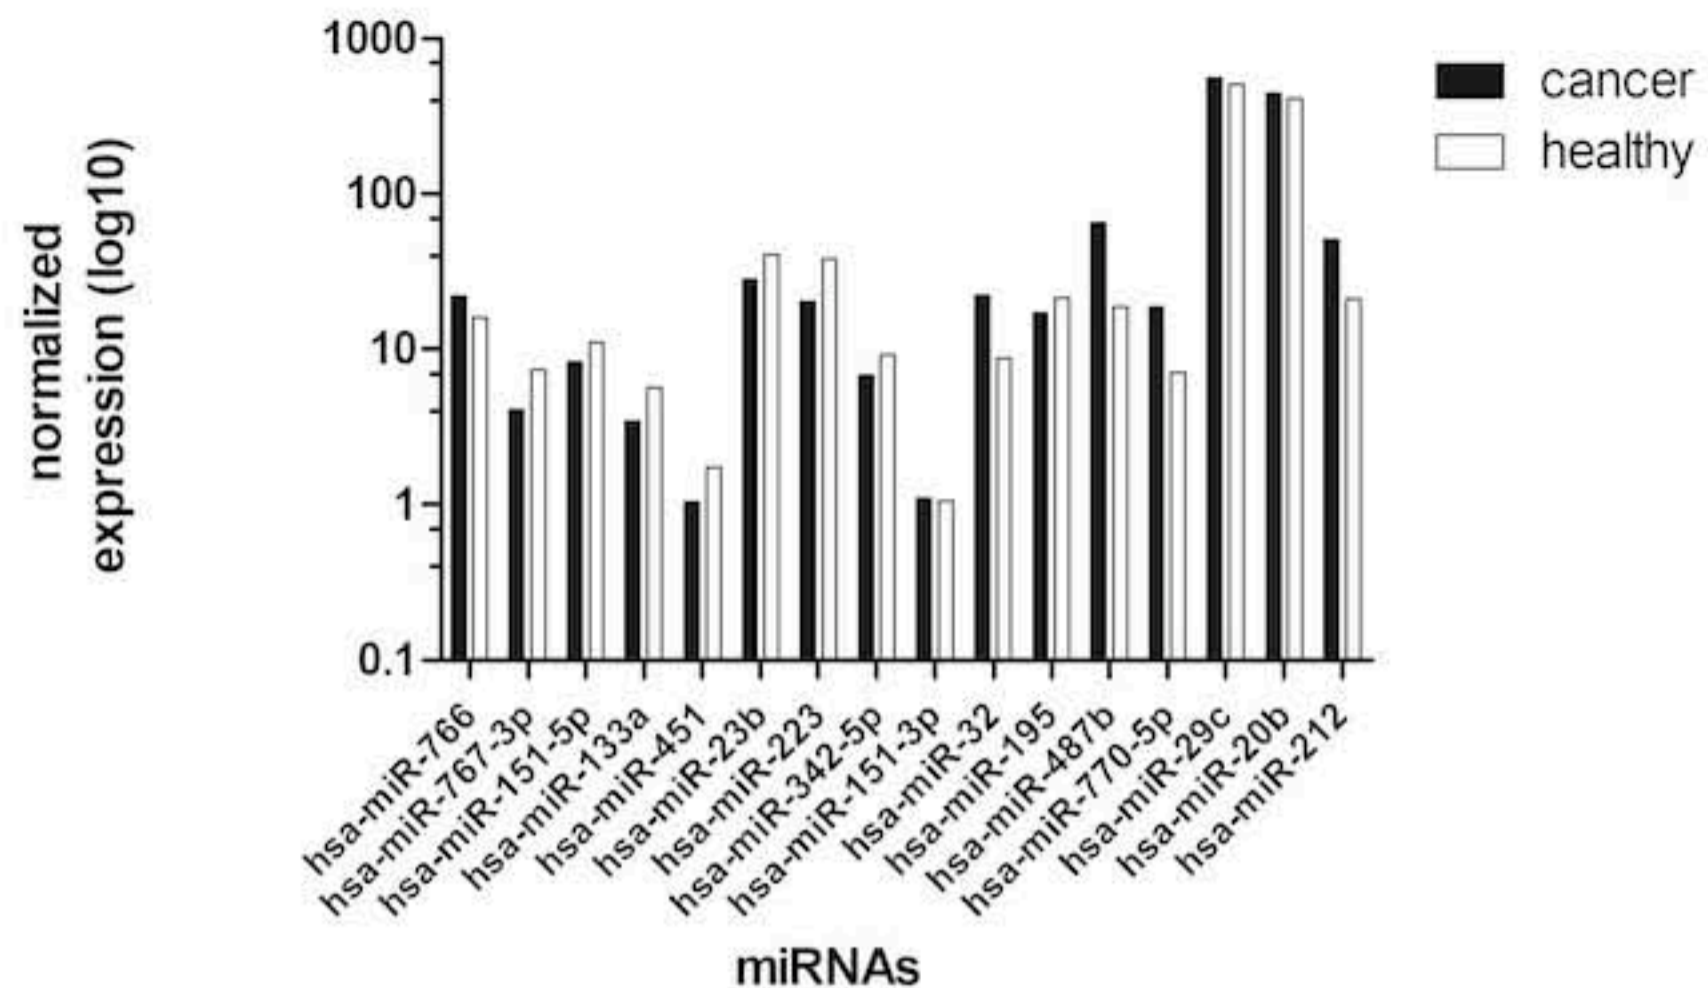

Family 1, TaqMan assays

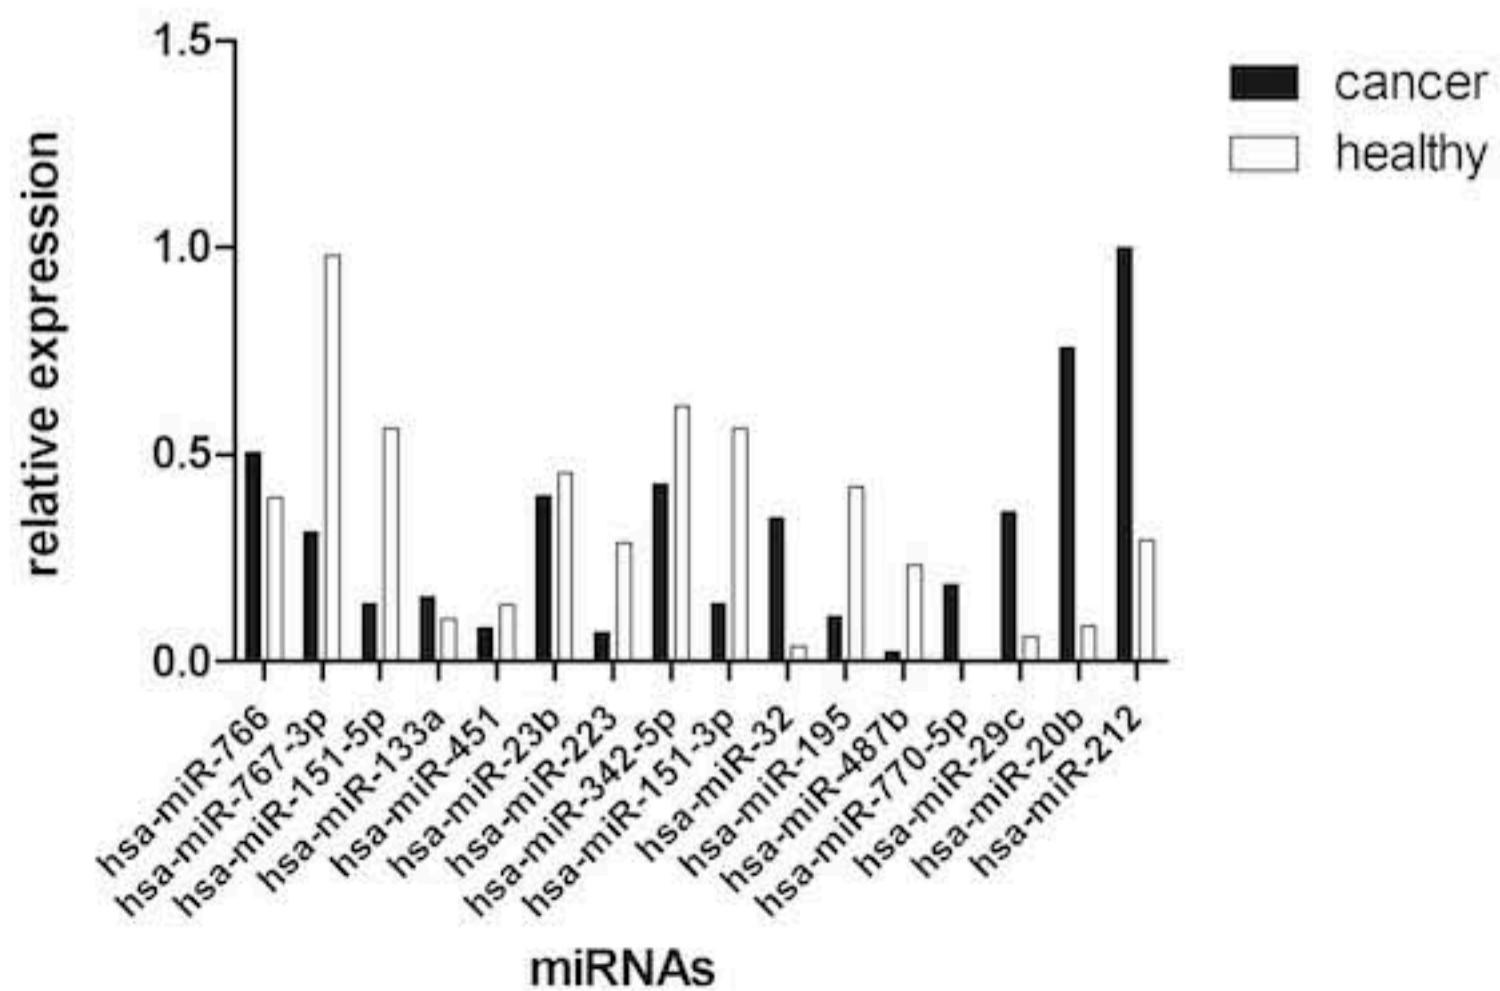

Family 15, TaqMan assays

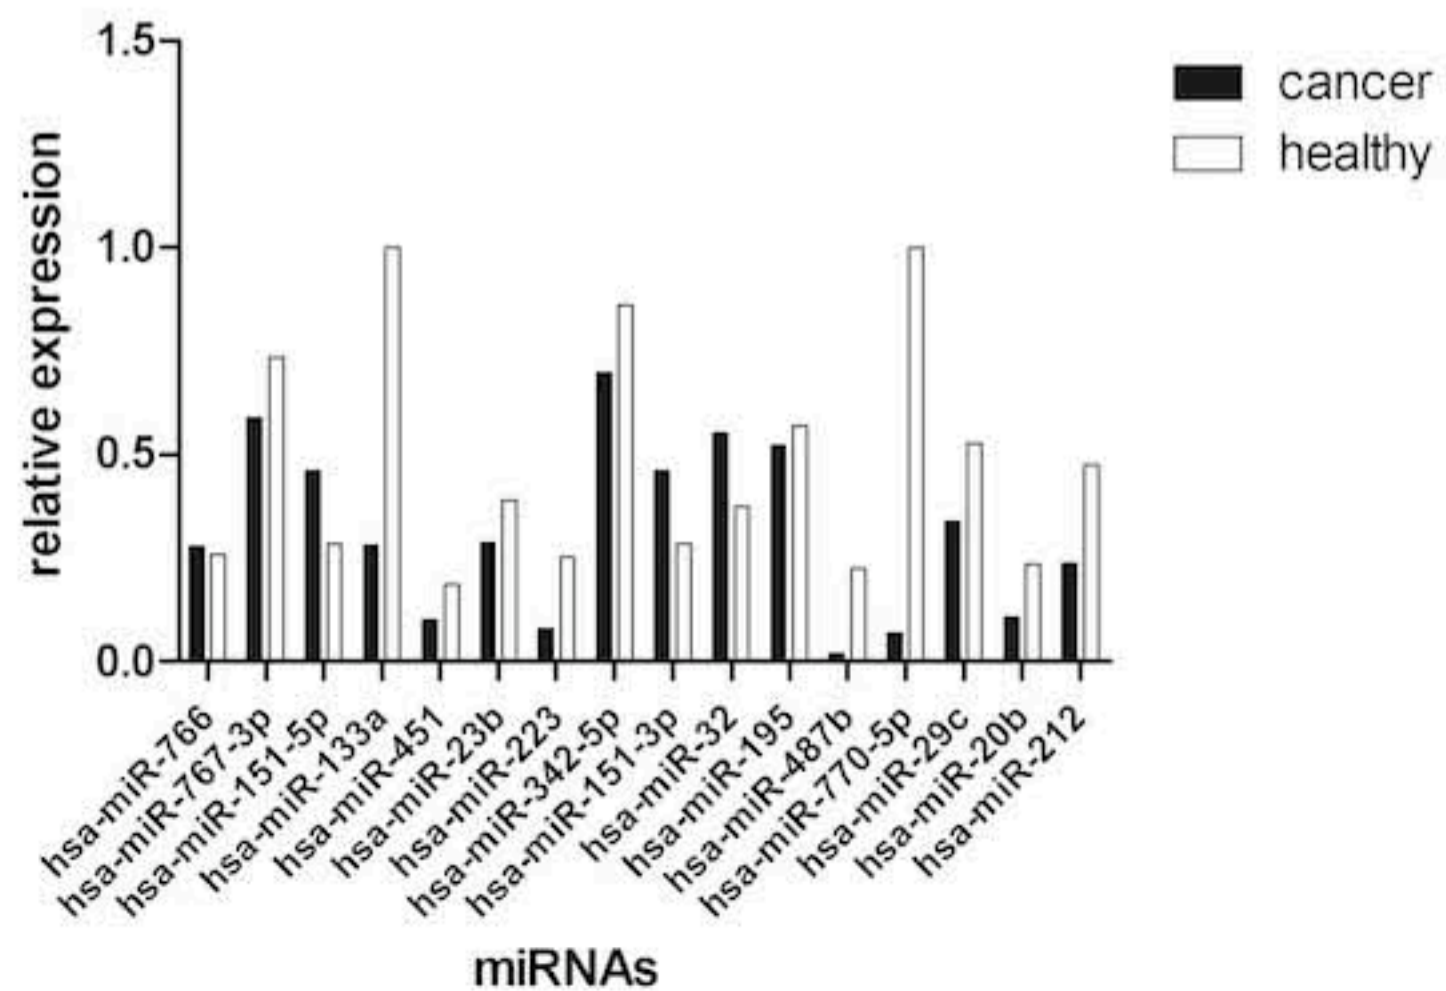

Supplement: MOESM1 [file 9462056]
